# Supplementary material for: Fabrication of an iron-doped Fe@Zn-MOF composite: empowering enhanced colorimetric recognition and energy storage performance
Source: Royal Society of Chemistry journal article supplement (doi:10.1039/d4nj01896f), 2024-01-01
Supplement: d4nj01896f1.pdf [file d4nj01896f1.pdf]

**Supplementary Information for New Journal of Chemistry**

**Fabrication of Iron-Doped Fe@Zn-MOF Composite: Empowering Enhanced Colorimetric Recognition and Energy Storage Performance**

Vibhav Shukla<sup>a</sup>, Waris<sup>b</sup>, Mohammad Zain Khan<sup>b</sup>, Kafeel Ahmad Siddiqui<sup>a\*</sup>

<sup>a</sup>Department of Chemistry, National Institute of Technology Raipur, G E Road Raipur – 492010, Chhattisgarh, India

<sup>b</sup>Department of Applied Chemistry, Faculty of Engineering and Technology, ZHCET, Aligarh Muslim University, Aligarh, UP (India) – 202002

<sup>a</sup> Corresponding Author: Dr. Kafeel Ahmad Siddiqui

<sup>a</sup> e-mail: [kasiddiqui.chy@nitrr.ac.in](mailto:kasiddiqui.chy@nitrr.ac.in)

**Section S1. Selection of Solvents**

We conducted a study on several solvents to better understand how well the as-produced Zn-MOF and Fe@Zn-MOF-2 can be detected. For fluorescence observations, a clear powder sample of Zn-MOF and Fe@Zn-MOF-2 (3 mg) was dissolved in 4 mL of various organic solvents, such as Ethanol (EtOH), Dimethyl sulfoxide (DMSO), Diethyl formamide (DEF), Tetrahydrofuran (THF), Chloroform (CHCl<sub>3</sub>), Nitrobenzene (NB), Acetonitrile (CH<sub>3</sub>CN), Methanol (MeOH), Dimethylformamide (DMF), water (H<sub>2</sub>O), Acetone, and Iso-Propanol (i-Propanol). The mixture underwent a 30-minute ultrasonic treatment and was left undisturbed for 24 hours to maintain stable suspensions. Following exposure to 300 nm radiation, the suspension exhibited detectable fluorescence over the 200–600 nm range at room temperature. The solution of Zn-MOF and Fe@Zn-MOF-2 exhibited varying levels of fluorescence intensity, depending on the solvent used. Following stimulation at a wavelength of 300 nm, both the Zn-MOF and Fe@Zn-MOF-2

exhibited a remarkable emission intensity at 115 nm and 630 nm in ethanolic and aqueous solutions, respectively. Fig. S1 and S2 depict the intensity and quenching efficiencies of different solvents for Zn-MOF and Fe@Zn-MOF-2, respectively.

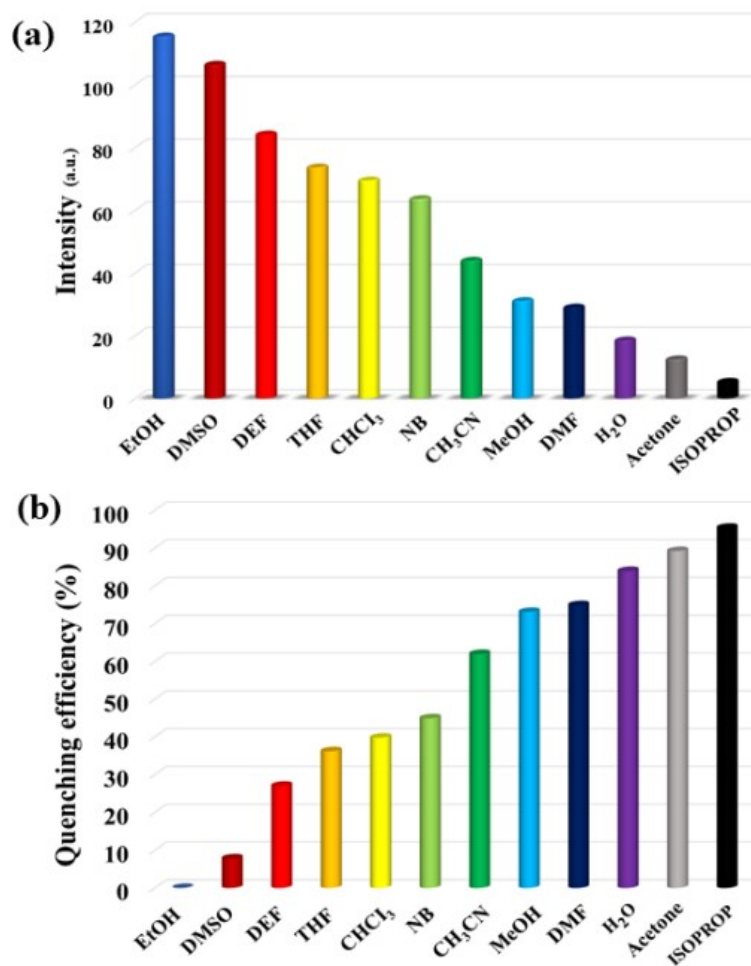

**Fig. S1** For Zn-MOF (a) fluorescence intensity levels (b) quenching efficiencies, when numerous solvents are introduced when excited at 300 nm.

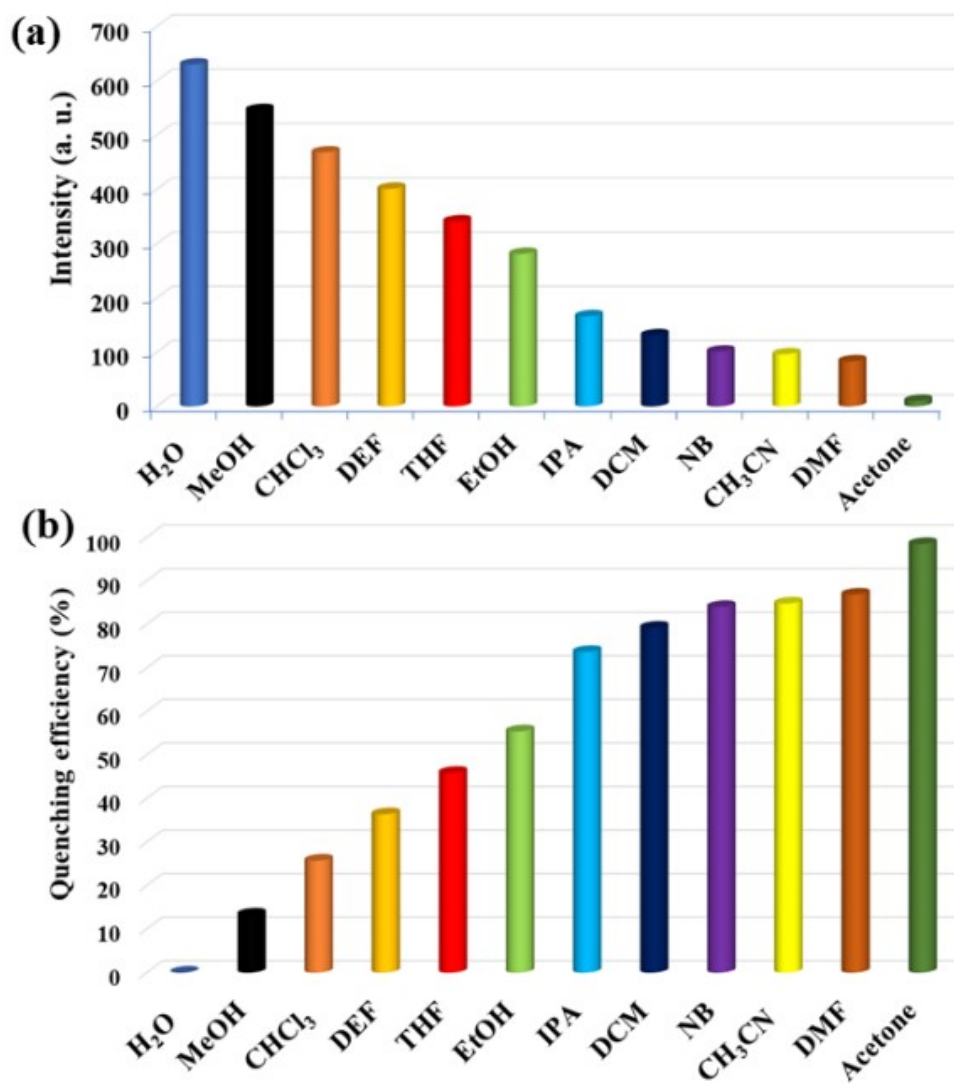

**Fig. S2** For Fe@Zn-MOF-2 (a) Fluorescence intensity levels (b) quenching efficiencies, when numerous solvents are introduced when excited at 300 nm.

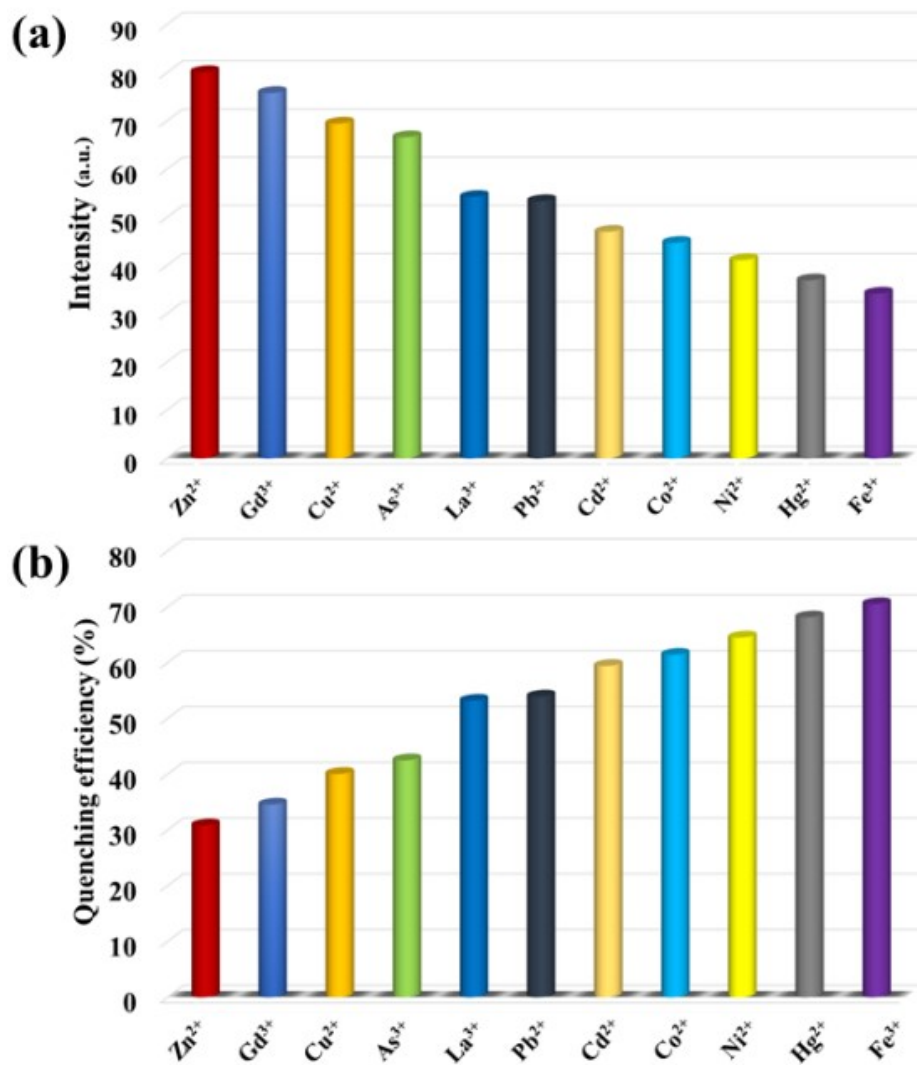

**Fig. S3** Fluorescence intensity levels and quenching efficiency for Zn-MOF when various metal cations are introduced when excited at 300 nm.

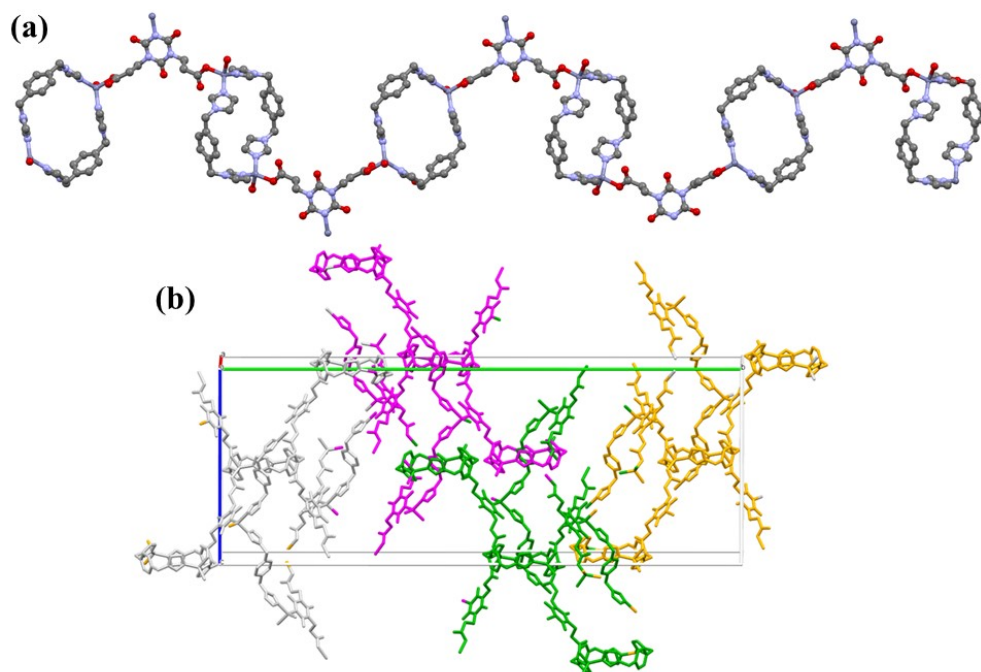

**Fig. S4** (a) 1D zig-zag chain like structure along with a-axis. (b) Unit cell representation of  $[\text{Zn}_9(\text{Cei})_6(\text{Bimb})_9]_n$  (**Zn-MOF**).

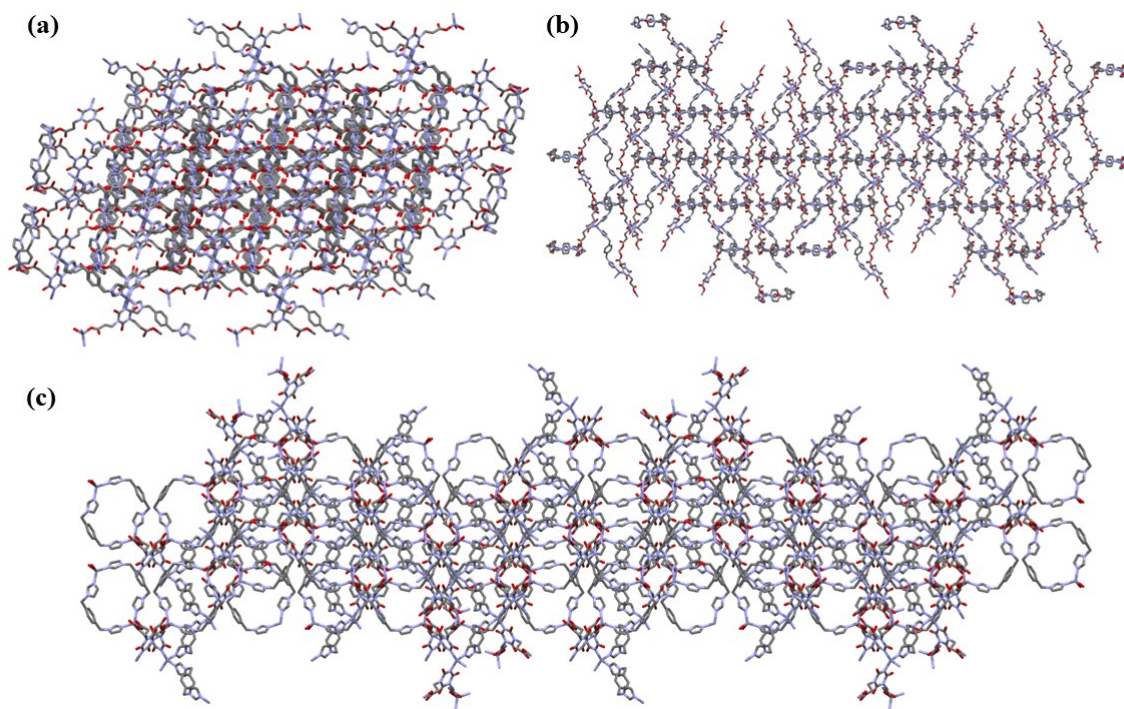

**Fig. S5** 2D structural representation of  $[\text{Zn}_9(\text{Cei})_6(\text{Bimb})_9]_n$  (**Zn-MOF**) along with (a) b-axis (b) c-axis and (c) along with a-axis.

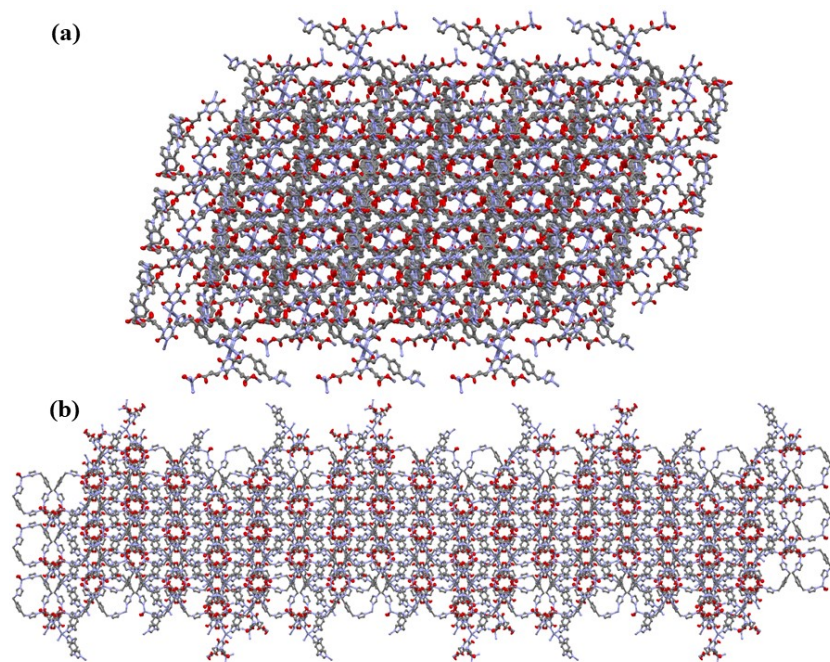

**Fig. S6** Three-dimensional structural representation of  $[Zn_9(Cei)_6(Bimb)_9]_n$  (**Zn-MOF**) along with (a) a-axis and (b) with b-axis.

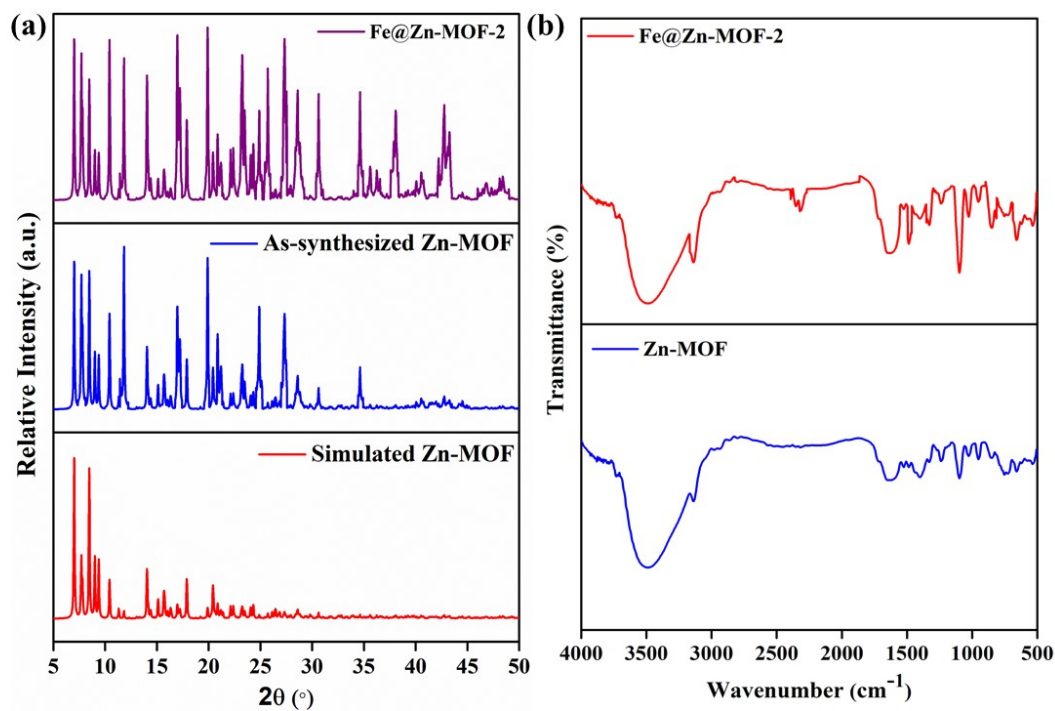

**Fig. S7** (a) PXRD spectra of Zn-MOF as-synthesized, simulated and Fe@Zn-MOF-2 (b) FTIR spectra of Zn-MOF and Fe@Zn-MOF-2.

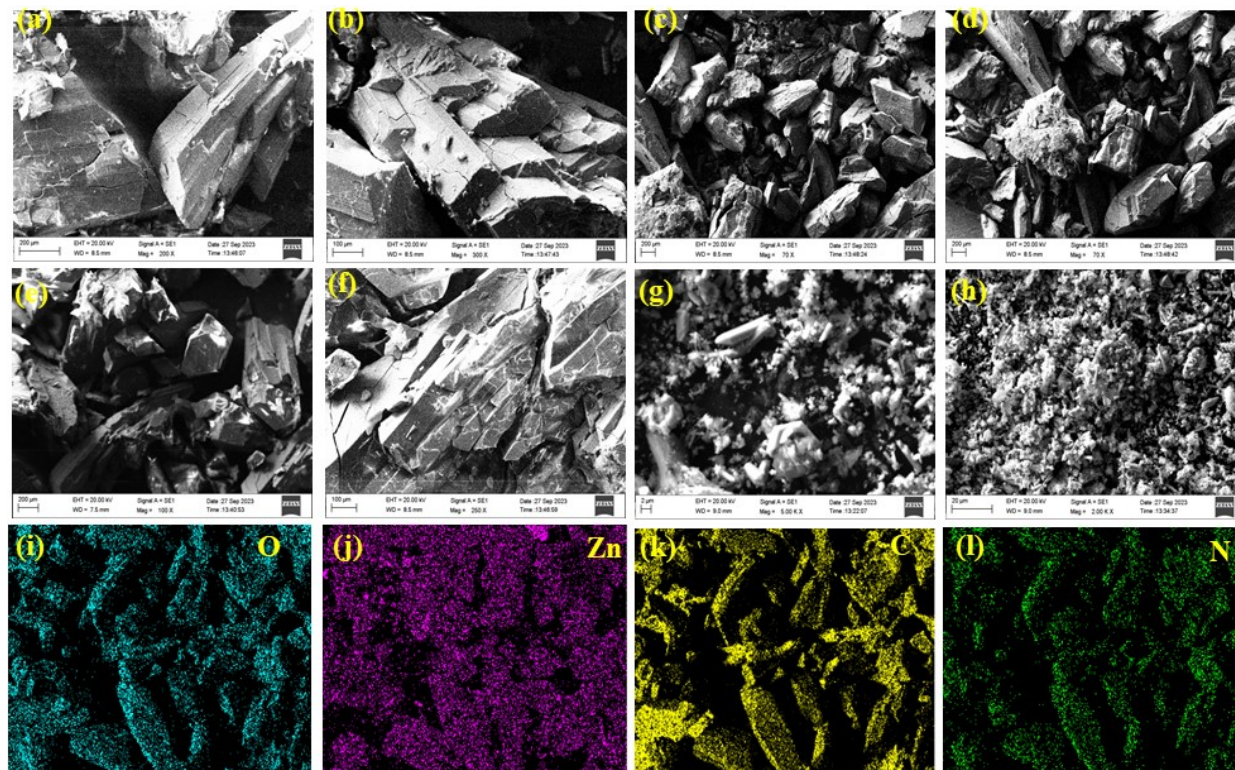

**Fig. S8** SEM images of (a-f)  $[\text{Zn}_9(\text{Cei})_6(\text{Bimb})_9]_n$  (Zn-MOF), (g-h) Zinc oxide nanoparticles at different magnification and (i-l) elemental mapping of (Zn-MOF).

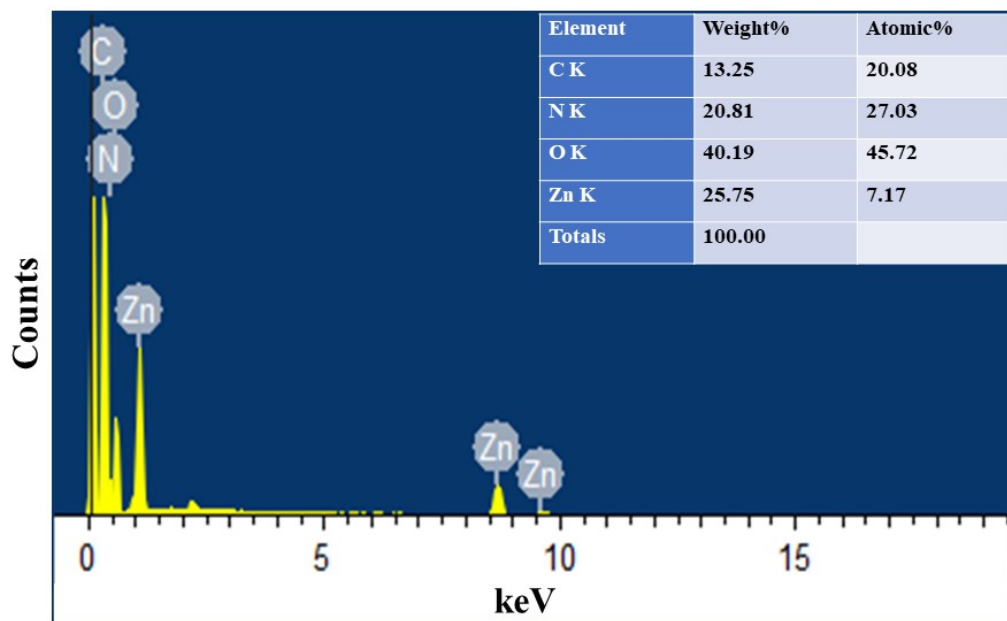

**Fig. S9** EDAX analysis of  $[\text{Zn}_9(\text{Cei})_6(\text{Bimb})_9]_n$  (Zn-MOF).

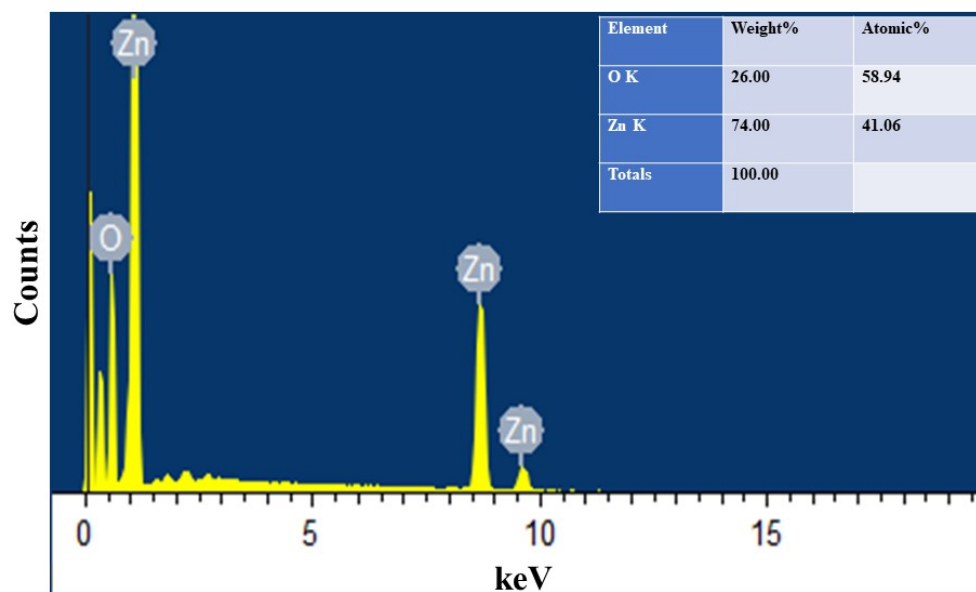

Fig.S10 EDAX analysis of Zinc-oxide nanoparticles.

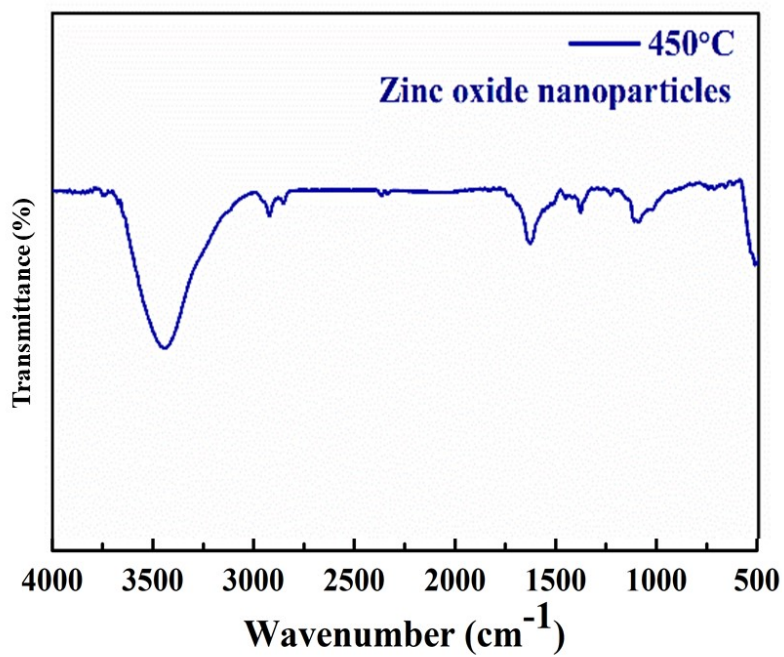

Fig. S11 FTIR spectra of Zinc-oxide nanoparticles.



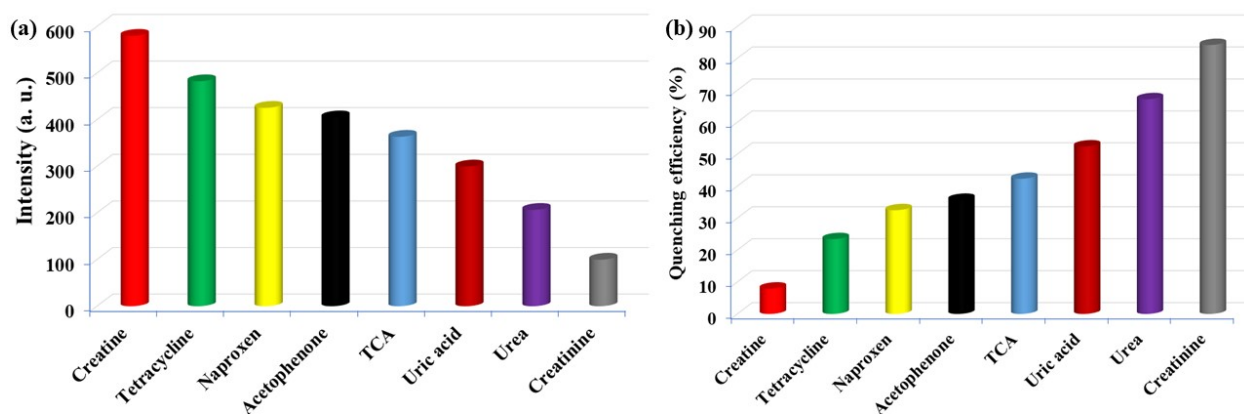

**Fig. S12** (a) The relative emission intensity of **Zn-MOF** after immersing the as-synthesized sample into various pure biomarkers and antibiotics when excited at 300 nm. (b) Comparing the fluorescence quenching efficiencies of **Zn-MOF** when introducing in different biomarkers and antibiotics in aqueous solutions.

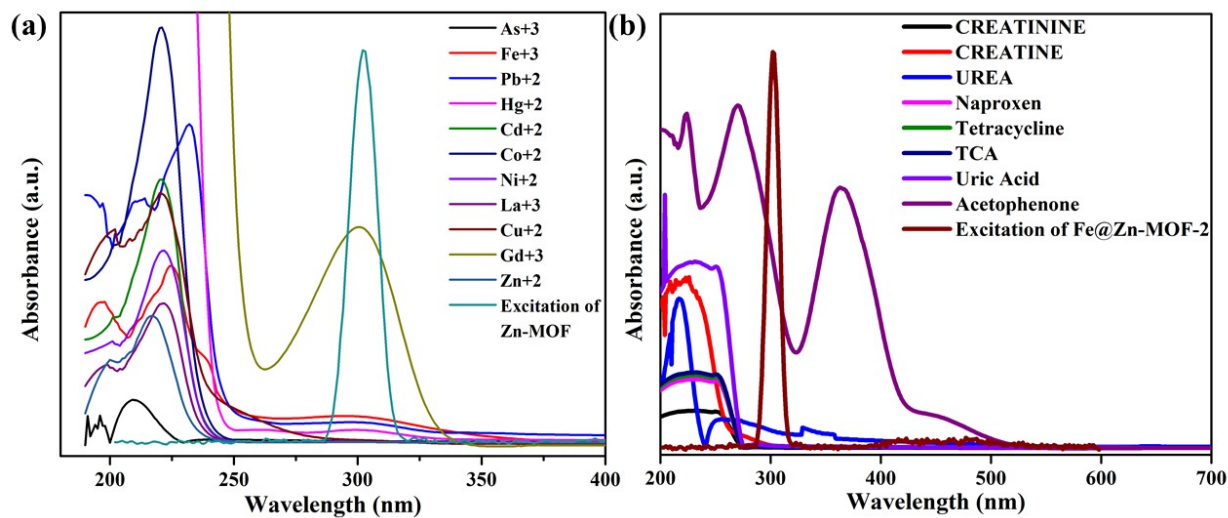

**Fig. S13** Spectral overlap between the UV-Vis absorption spectra of various analytes (a) metal cations (b) biomarkers and the excitation spectra of **Fe@Zn-MOF-2**.

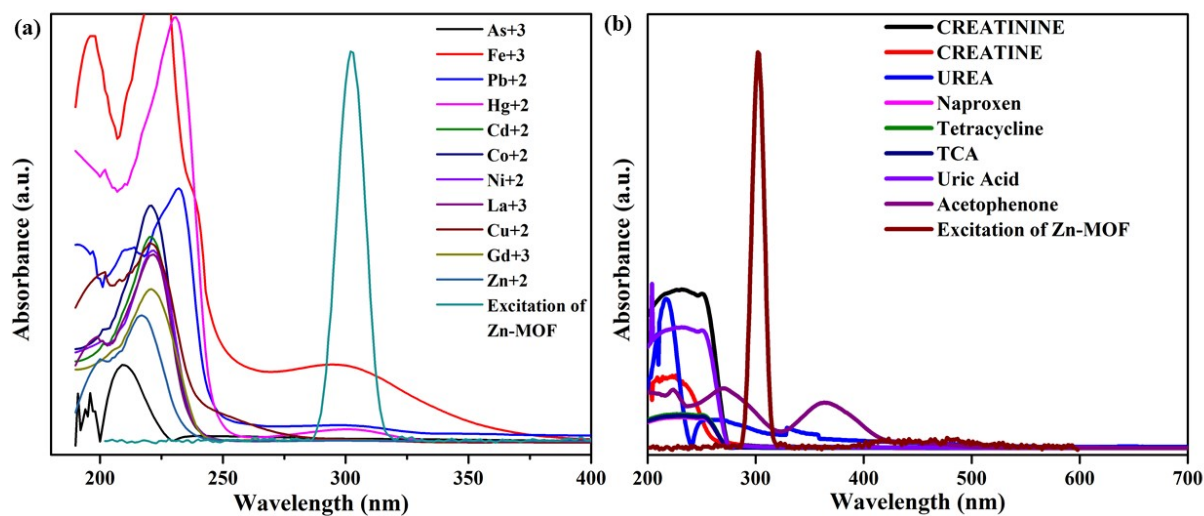

**Fig. S14** Spectral overlap between the UV-Vis absorption spectra of various analytes and the excitation spectra of **Zn-MOF**.

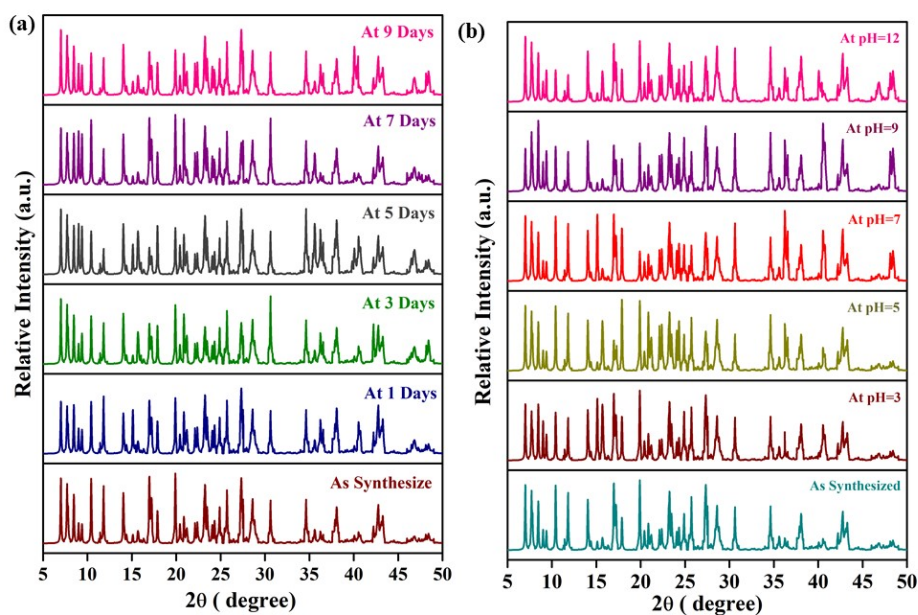

**Fig. S15** PXRD spectra of Fe@Zn-MOF-2 (a) after removing from water (b) in different pH solution.

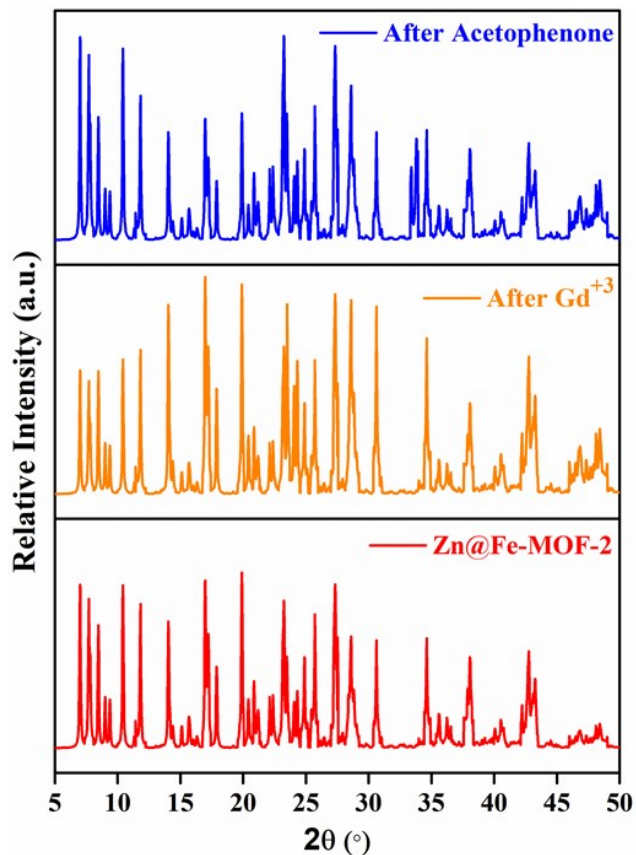

Fig. S16 PXR D spectra of Fe@Zn-MOF after sensing experiment.

Table. S1 Crystal Structure data and structural refinement data for  $[\text{Zn}_9(\text{Cei})_6(\text{Bimb})_9]_n$  (Zn-MOF).

| Identification Code                | $[\text{Zn}_9(\text{Cei})_6(\text{Bimb})_9]_n$                                 |
|------------------------------------|--------------------------------------------------------------------------------|
| Empirical formula                  | $\text{C}_{180}\text{H}_{174}\text{N}_{54}\text{O}_{42}\text{Zn}_9$ [+Solvent] |
| Formula weight                     | 4354.05                                                                        |
| Temperature/K                      | 293 K                                                                          |
| Crystal system                     | Monoclinic                                                                     |
| Space group                        | $\text{P2}_1/\text{n}$                                                         |
| $a/\text{\AA}$                     | 13.6442(1)                                                                     |
| $b/\text{\AA}$                     | 68.8042(5)                                                                     |
| $c/\text{\AA}$                     | 25.8089(1)                                                                     |
| $\alpha/^\circ$                    | 90                                                                             |
| $\beta/^\circ$                     | 102.409(1)                                                                     |
| $\gamma/^\circ$                    | 90                                                                             |
| Volume/ $\text{\AA}^3$             | 23662.8(3)                                                                     |
| Z                                  | 4                                                                              |
| $\rho_{\text{calc}}/\text{g/cm}^3$ | 1.223                                                                          |
| $\mu/\text{mm}^{-1}$               | 1.61                                                                           |
| F(000)                             | 8952.0                                                                         |

|                                                   |                                                                |
|---------------------------------------------------|----------------------------------------------------------------|
| <b>Crystal size/mm<sup>3</sup></b>                | 0.390 × 0.230 × 0.170                                          |
| <b>Radiation</b>                                  | Cu Kα (λ = 1.54184)                                            |
| <b>2θ range for data collection/°</b>             | 3.734 to 136.57                                                |
| <b>Index ranges</b>                               | -11 ≤ h ≤ 16, -82 ≤ k ≤ 82, -31 ≤ l ≤ 30                       |
| <b>Reflections collected</b>                      | 231011                                                         |
| <b>Independent reflections</b>                    | 43002 [R <sub>int</sub> = 0.0354, R <sub>sigma</sub> = 0.0283] |
| <b>Data/restraints/parameters</b>                 | 43002/0/2567                                                   |
| <b>Goodness-of-fit on F<sup>2</sup></b>           | 1.063                                                          |
| <b>Final R indexes [I&gt;=2σ (I)]</b>             | R <sub>1</sub> = 0.0623, wR <sub>2</sub> = 0.1856              |
| <b>Final R indexes [all data]</b>                 | R <sub>1</sub> = 0.0770, wR <sub>2</sub> = 0.1978              |
| <b>Largest diff. peak/hole / e Å<sup>-3</sup></b> | 1.50/-0.68                                                     |
| <b>CCDC No.</b>                                   | 2339587                                                        |

**Table S2: Selected bond lengths of Zn-MOF(Å).**

|                      |             |
|----------------------|-------------|
| Zn1—O39 <sup>i</sup> | 1.961 (2)   |
| Zn1—N19              | 1.988 (2)   |
| Zn1—N30              | 1.998 (3)   |
| Zn1—O13              | 2.012 (2)   |
| Zn2—O38              | 1.948 (2)   |
| Zn2—N54              | 1.987 (2)   |
| Zn2—N26              | 1.998 (3)   |
| Zn2—O29              | 2.025 (3)   |
| Zn3—O8               | 1.964 (2)   |
| Zn3—O40              | 1.9767 (19) |
| Zn3—N44              | 1.983 (2)   |
| Zn3—N16              | 1.998 (2)   |
| Zn4—O15              | 1.971 (2)   |

|                         |           |
|-------------------------|-----------|
| Zn4—O5                  | 1.974 (2) |
| Zn4—N20                 | 1.990 (2) |
| Zn4—N22                 | 2.000 (2) |
| Zn5—N32                 | 2.000 (2) |
| Zn5—N6 <sup>ii</sup>    | 2.001 (2) |
| Zn5—N11                 | 2.030 (2) |
| Zn5—N12                 | 2.034 (2) |
| Zn6—N23 <sup>iii</sup>  | 2.002 (2) |
| Zn6—N3                  | 2.008 (2) |
| Zn6—N13 <sup>iv</sup>   | 2.031 (2) |
| Zn6—N17 <sup>v</sup>    | 2.033 (2) |
| Zn7—O30 <sup>vi</sup>   | 1.963 (3) |
| Zn7—O42                 | 1.971 (2) |
| Zn7—N15                 | 1.987 (2) |
| Zn7—N25                 | 1.999 (2) |
| Zn8—O6                  | 1.938 (3) |
| Zn8—N50 <sup>vii</sup>  | 1.986 (2) |
| Zn8—N31 <sup>vii</sup>  | 2.000 (3) |
| Zn8—O20 <sup>i</sup>    | 2.021 (3) |
| Zn9—N14 <sup>viii</sup> | 1.998 (2) |
| Zn9—N7                  | 2.001 (2) |
| Zn9—N49                 | 2.023 (2) |
| Zn9—N24                 | 2.037 (2) |

**Symmetry Element of Zn**-<sup>1</sup>-1-X,-Y,1-Z; <sup>2</sup>1+X,+Y,-1+Z; <sup>3</sup>1+X,+Y,1+Z; <sup>4</sup>3/2+X,1/2-Y,1/2+Z;  
<sup>5</sup>1/2+X,1/2-Y,1/2+Z; <sup>6</sup>+X,+Y,-1+Z; <sup>7</sup>-1+X,+Y,1+Z; <sup>8</sup>2-X,-Y,2-Z; <sup>9</sup>1-X,-Y,2-Z; <sup>10</sup>-3/2+X,1/2-Y,-  
1/2+Z; <sup>11</sup>-1/2+X,1/2-Y,-1/2+Z; <sup>12</sup>+X,+Y,1+Z

**Table S3: Selected bond Angles of Zn-MOF(°).**

|                           |             |
|---------------------------|-------------|
| O39 <sup>i</sup> —Zn1—N19 | 110.03 (10) |
|---------------------------|-------------|

|                            |             |
|----------------------------|-------------|
| O39 <sup>i</sup> —Zn1—N30  | 108.99 (10) |
| N19—Zn1—N30                | 117.16 (10) |
| O39 <sup>i</sup> —Zn1—O13  | 95.53 (10)  |
| N19—Zn1—O13                | 110.34 (10) |
| N30—Zn1—O13                | 112.62 (11) |
| O38—Zn2—N54                | 111.21 (11) |
| O38—Zn2—N26                | 108.59 (11) |
| N54—Zn2—N26                | 116.87 (10) |
| O38—Zn2—O29                | 95.27 (12)  |
| N54—Zn2—O29                | 110.24 (11) |
| N26—Zn2—O29                | 112.55 (12) |
| O8—Zn3—O40                 | 94.06 (9)   |
| O8—Zn3—N44                 | 114.86 (10) |
| O40—Zn3—N44                | 108.83 (9)  |
| O8—Zn3—N16                 | 107.21 (10) |
| O40—Zn3—N16                | 113.58 (9)  |
| N44—Zn3—N16                | 116.27 (10) |
| O15—Zn4—O5                 | 93.39 (10)  |
| O15—Zn4—N20                | 113.71 (11) |
| O5—Zn4—N20                 | 109.11 (10) |
| O15—Zn4—N22                | 108.00 (11) |
| O5—Zn4—N22                 | 114.31 (10) |
| N20—Zn4—N22                | 116.17 (10) |
| N32—Zn5—N6 <sup>ii</sup>   | 118.40 (11) |
| N32—Zn5—N11                | 122.39 (9)  |
| N6 <sup>ii</sup> —Zn5—N11  | 98.45 (9)   |
| N32—Zn5—N12                | 97.51 (10)  |
| N6 <sup>ii</sup> —Zn5—N12  | 121.34 (9)  |
| N11—Zn5—N12                | 98.73 (10)  |
| N23 <sup>iii</sup> —Zn6—N3 | 118.53 (11) |

|                                            |             |
|--------------------------------------------|-------------|
| N23 <sup>iii</sup> —Zn6—N13 <sup>iv</sup>  | 98.43 (10)  |
| N3—Zn6—N13 <sup>iv</sup>                   | 122.41 (10) |
| N23 <sup>iii</sup> —Zn6—N17 <sup>v</sup>   | 121.39 (9)  |
| N3—Zn6—N17 <sup>v</sup>                    | 97.26 (10)  |
| N13 <sup>iv</sup> —Zn6—N17 <sup>v</sup>    | 98.82 (10)  |
| O30 <sup>vi</sup> —Zn7—O42                 | 92.85 (12)  |
| O30 <sup>vi</sup> —Zn7—N15                 | 114.46 (11) |
| O42—Zn7—N15                                | 109.47 (11) |
| O30 <sup>vi</sup> —Zn7—N25                 | 107.21 (11) |
| O42—Zn7—N25                                | 114.28 (11) |
| N15—Zn7—N25                                | 116.30 (10) |
| O6—Zn8—N50 <sup>vii</sup>                  | 110.80 (11) |
| O6—Zn8—N31 <sup>vii</sup>                  | 108.92 (12) |
| N50 <sup>vii</sup> —Zn8—N31 <sup>vii</sup> | 117.28 (10) |
| O6—Zn8—O20 <sup>i</sup>                    | 95.18 (14)  |
| N50 <sup>vii</sup> —Zn8—O20 <sup>i</sup>   | 109.57 (11) |
| N31 <sup>vii</sup> —Zn8—O20 <sup>i</sup>   | 112.89 (12) |
| N14 <sup>viii</sup> —Zn9—N7                | 118.42 (11) |
| N14 <sup>viii</sup> —Zn9—N49               | 122.04 (10) |
| N7—Zn9—N49                                 | 97.92 (10)  |
| N14 <sup>viii</sup> —Zn9—N24               | 97.81 (10)  |
| N7—Zn9—N24                                 | 121.82 (10) |
| N49—Zn9—N24                                | 98.88 (11)  |
| C19—O5—Zn4                                 | 112.1 (2)   |
| C89—O6—Zn8                                 | 119.1 (3)   |
| C59—O8—Zn3                                 | 121.2 (2)   |
| C97—O13—Zn1                                | 110.4 (2)   |
| C94—O15—Zn4                                | 122.0 (2)   |
| C126—O20—Zn8 <sup>vi</sup>                 | 110.2 (3)   |
| C119—O29—Zn2                               | 108.9 (3)   |

|                             |             |
|-----------------------------|-------------|
| C99—O30—Zn7 <sup>i</sup>    | 120.5 (2)   |
| C102—O38—Zn2                | 117.0 (2)   |
| C153—O39—Zn1 <sup>vi</sup>  | 117.5 (2)   |
| C5—O40—Zn3                  | 113.18 (19) |
| C54—O42—Zn7                 | 111.4 (2)   |
| C9—N6—Zn5 <sup>ii</sup>     | 122.6 (2)   |
| C10—N6—Zn5 <sup>ii</sup>    | 115.77 (17) |
| C60—N7—C33                  | 122.0 (3)   |
| C60—N7—Zn9                  | 122.0 (2)   |
| C33—N7—Zn9                  | 115.73 (18) |
| C30—N11—Zn5                 | 132.2 (2)   |
| C55—N11—Zn5                 | 121.3 (2)   |
| C14—N12—Zn5                 | 132.0 (2)   |
| C82—N12—Zn5                 | 121.4 (2)   |
| C32—N13—Zn6 <sup>x</sup>    | 132.2 (2)   |
| C75—N13—Zn6 <sup>x</sup>    | 121.4 (2)   |
| C64—N14—Zn9 <sup>viii</sup> | 121.2 (2)   |
| C24—N14—Zn9 <sup>viii</sup> | 116.45 (19) |
| C2—N15—Zn7                  | 125.0 (2)   |
| C144—N15—Zn7                | 128.5 (2)   |
| C11—N16—C147                | 105.4 (2)   |
| C11—N16—Zn3                 | 129.1 (2)   |
| C147—N16—Zn3                | 125.5 (2)   |
| C25—N17—Zn6 <sup>xi</sup>   | 132.1 (2)   |
| C74—N17—Zn6 <sup>xi</sup>   | 121.5 (2)   |
| C3—N19—Zn1                  | 126.4 (2)   |
| C42—N19—Zn1                 | 127.6 (2)   |
| C6—N20—Zn4                  | 124.6 (2)   |
| C137—N20—Zn4                | 128.27 (19) |
| C8—N22—Zn4                  | 129.1 (2)   |



|                            |             |
|----------------------------|-------------|
| C65—N22—Zn4                | 125.1 (2)   |
| C37—N23—Zn6 <sup>iii</sup> | 122.1 (2)   |
| C26—N23—Zn6 <sup>iii</sup> | 115.82 (18) |
| C57—N24—Zn9                | 132.2 (2)   |
| C164—N24—Zn9               | 121.3 (2)   |
| C50—N25—Zn7                | 129.0 (2)   |
| C162—N25—Zn7               | 125.2 (2)   |
| C53—N26—Zn2                | 127.6 (2)   |
| C120—N26—Zn2               | 126.2 (2)   |
| C49—N30—Zn1                | 127.4 (2)   |
| C104—N30—Zn1               | 126.3 (2)   |
| C29—N31—Zn8 <sup>xii</sup> | 128.1 (2)   |
| C92—N31—Zn8 <sup>xii</sup> | 126.2 (2)   |
| C12—N32—Zn5                | 120.8 (2)   |
| C16—N32—Zn5                | 116.49 (18) |
| C28—N49—Zn9                | 132.0 (2)   |
| C163—N49—Zn9               | 121.8 (2)   |
| C13—N50—Zn8 <sup>xii</sup> | 126.0 (2)   |
| C46—N50—Zn8 <sup>xii</sup> | 127.8 (2)   |

**Symmetry Element of Zn**-<sup>1</sup>-1-X,-Y,1-Z; <sup>2</sup>1+X,+Y,-1+Z; <sup>3</sup>1+X,+Y,1+Z; <sup>4</sup>3/2+X,1/2-Y,1/2+Z;  
<sup>5</sup>1/2+X,1/2-Y,1/2+Z; <sup>6</sup>+X,+Y,-1+Z; <sup>7</sup>-1+X,+Y,1+Z; <sup>8</sup>2-X,-Y,2-Z; <sup>9</sup>1-X,-Y,2-Z; <sup>10</sup>-3/2+X,1/2-Y,-  
1/2+Z; <sup>11</sup>-1/2+X,1/2-Y,-1/2+Z; <sup>12</sup>+X,+Y,1+Z

**Table S4** Comparison of LOD values of Fe@Zinc-MOF-2 and previously reported materials.

| S. No. | Material  | Analyte          | LOD     | Ref. |
|--------|-----------|------------------|---------|------|
| 1.     | AuNP@BSPP | Gd <sup>+3</sup> | 0.74 mM | 1.   |

|     |                                 |                                  |                                   |              |
|-----|---------------------------------|----------------------------------|-----------------------------------|--------------|
| 2.  | Gd-based contrasting agents     | Gd <sup>+3</sup>                 | 0.40–20 mM                        | 2.           |
| 3.  | GdDTPA-BMA                      | Gd <sup>+3</sup>                 | 0.3 mM (serum),<br>1.1 mM (urine) | 3.           |
| 4.  | Gadodiamide                     | Gd <sup>+3</sup>                 | 1.9 mM (ICP-AES of<br>serum)      | 4.           |
| 5.  | Gd-based contrasting agents     | Gd <sup>+3</sup>                 | 0.1–1 mM                          | 5.           |
| 6.  | Gd-based contrasting agents     | Gd <sup>+3</sup>                 | 0.05–0.2 mM                       | 6.           |
| 7.  | Pr <sub>6</sub> O <sub>11</sub> | Acetophenone                     | 0.7 ppm                           | 7.           |
| 8.  | Fusion protein                  | Acetophenone                     | 50 μM to 250 μM                   | 8.           |
| 9.  | Ionic liquids                   | Acetophenone                     | 1.0 to 4.7 ppm                    | 9.           |
| 10. | Fe@Zinc-MOF-2                   | Gd <sup>+3</sup><br>Acetophenone | 0.204 ppm<br>0.192 ppm            | This<br>work |

#### References –

1. M. Yon, C. Pibourret, J.-D. Marty and D. Ciuculescu-Pradines, *Nanoscale Adv.*, 2020, **2**, 4671–4681.
2. M. Andr'asi, A. G'asp'ar, O. Kov'acs, Z. Baranyai, A. Klekner and E. Br'ucher, *Electrophoresis*, 2011, **32**, 2223–2228.
3. E. Hvattum, P. T. Normann, G. C. Jamieson, J.-J. Lai and T. Skotland, *J. Pharm. Biomed. Anal.*, 1995, **13**, 927–932.
4. P. T. Normann, P. Joffe, I. Martinsen and H. S. Thomsen, *J. Pharm. Biomed. Anal.*, 2000, **22**, 939–947.

5. J. Künemeyer, L. Terborg, S. Nowak, A. Scheffer, L. Telgmann, F. Tokmak, A. Günzel, G. Wiesmüller, S. Reichelt and U. Karst, *Anal. Chem.*, 2008, **80**, 8163–8170.
6. C. L. Kahakachchi and D. A. Moore, *J. Anal. At. Spectrom.*, 2009, **24**, 1389.
7. Q.-C. Zhang, W.-L. Yan, L. Jiang, Y.-G. Zheng, J.-X. Wang and R.-K. Zhang, *Molecules*, 2019, **24**, 4275.
8. E. Muhr, O. Leicht, S. González Sierra, M. Thanbichler and J. Heider, *Front. Microbiol.*, 2015, **6**, 1561.
9. J. Gębicki, A. Kloskowski and W. Chrzanowski, *Sens. Actuators B Chem.*, 2013, **177**, 1173–1179.
